# Supplementary material for: Enzyme-mediated proximity labeling reveals the co-translational targeting of DLGAP5 mRNA to the centrosome during mitosis
Source: Royal Society of Chemistry journal article supplement (doi:10.1039/d4cb00155a), 2025-01-01
Supplement: d4cb00155a2.xlsx [file d4cb00155a2.xlsx]

## Sheet: Human DLGAP5
Probe name	Probe hybridization sequence (with FLAP concatinated on the 3' end)
DLGAP5_P1	AAAGTAAAGAACACTCGGTCTGGACGACCAC
DLGAP5_P2	ATGTGATGAAGACATCCTGAGCCACCTT
DLGAP5_P3	ATTGCCCTTGGCTTAACATTGGTCTTTTCT
DLGAP5_P4	TTTGGAGCATCTGTTTTCGTTGATCACCTAG
DLGAP5_P5	TTCCTCGTTTAGCTTTCTCTCTCTGCT
DLGAP5_P6	AAAACAAGGCATATCAGGTCTATAACGACCC
DLGAP5_P7	TTTTTGGCTCAGCTTTCACAGCATTCTGG
DLGAP5_P8	GGCCTTTGACCTTGTAATCCGTACAGAAGAT
DLGAP5_P9	ACTCTCGTTATCAATCTTAGTCTGCTCCA
DLGAP5_P10	TCAGAAGTTTGTCTTGGACCAGGTCGGATTG
DLGAP5_P11	GCTTGAGTAGCTGATCGAGTCATTCTCAAC
DLGAP5_P12	TTGCTGTGGTAGATGAGACTGTTCTGGGAAC
DLGAP5_P13	TTCTGGTTCGTTTTCATTAGCAGCTCTTGTG
DLGAP5_P14	GGTGTTACTTGATAGGTCTTCAGACCATCC
DLGAP5_P15	AACTGGGTGTCAAAAAAGCATTGGCACTTCT
DLGAP5_P16	ACATGTTCTTCATGCCAAACAGTTAGAGGAC
DLGAP5_P17	TCGACCTTCATTTCTTTCAAGTGATGGGACT
DLGAP5_P18	ACTGGAGGATATTTCTGAAATATGGCACACC
DLGAP5_P19	TCATAAGGAGTCTTGTTTGACCAACTGCTGT
DLGAP5_P20	CAGATCTGTACAGGTAGTCTCCTTTATACCT
DLGAP5_P21	TTATGGCAGCTAGGCGATTTCTCGCTG
DLGAP5_P22	CATTCTTCCTGCCTAATTCTCTCTCTC
DLGAP5_P23	ACTTAGGTGTTCCAAGTCTTTGAGAAGGGCC
DLGAP5_P24	GGTGATGTAGTTTGTTGTGGAATGCCCATCT
DLGAP5_P25	TCACATGTTCACTTTTCGTATTCTGAGGACC
DLGAP5_P26	AGACCTGGTGAATCAAGAAGGTGGCATTCAG
DLGAP5_P27	TGTCTCCTCTCCAGCTGAGTAAATGGATT
DLGAP5_P28	TCAGGTTACCACCAAAAGAAATGTGTCTGGC

## Sheet: mouse Dlgap5
Probe name	Probe hybridization sequence (with FLAP concatinated on the 3' end)
Mouse_Dlgap5_P1	AAGTTGGTTCTAACCATCTCAGTGCTCGAG
Mouse_Dlgap5_P2	CGTCCTTCAAACCGAAGTGTCTGTTTCGCT
Mouse_Dlgap5_P3	TATTACCAAGCTCTCGCCCTTCCAGT
Mouse_Dlgap5_P4	GCCTTCTCTGGAGAGAGGTCTTGCGAT
Mouse_Dlgap5_P5	GTCACTCAGGACCATTTTTACTGACCTTGT
Mouse_Dlgap5_P6	CGCAGCGGGTCTATAGAGACCCACTTT
Mouse_Dlgap5_P7	TGGTCTTTGATCTTGTAATCCGTCCAGTATG
Mouse_Dlgap5_P8	TCCTGCTACCAATCTTAGTCTGCTCC
Mouse_Dlgap5_P9	CAGAAGTTTGTCTTTGGTCACTCTGGGTTGC
Mouse_Dlgap5_P10	CAGCACAGGCTGCATAACTTTTCTCTCT
Mouse_Dlgap5_P11	GAGTAGCCGCTGATTCAGTCCCTTTCC
Mouse_Dlgap5_P12	GTGGATGACACTGTTCGGGCCATCAGC
Mouse_Dlgap5_P13	CTTTCTCATTCGTGGCTCTTGTGACTGG
Mouse_Dlgap5_P14	GGAAGGAATAACCTTGTCCGGCTTGCCT
Mouse_Dlgap5_P15	GTCTGCGAATCCAAATGCTTTTCGTCCC
Mouse_Dlgap5_P16	GAAGACTCCGAGCGGACCCATTTCACT
Mouse_Dlgap5_P17	ACAGTGCTTGGGGGCAAAGGACTTCCT
Mouse_Dlgap5_P18	AGGAAAGCGTTGGCACTTCTAGGGCTCA
Mouse_Dlgap5_P19	GACATGTTCTTTACTACGGTCTGTTAGCGAC
Mouse_Dlgap5_P20	GGATTTTTCTGAAGTATGGCACATCGTGGGG
Mouse_Dlgap5_P21	ACCAACCGTTGTACGGATAAGACCTTTAGC
Mouse_Dlgap5_P22	TATTGCTGTCTTTCCATCCTGACGCC
Mouse_Dlgap5_P23	ACCGGGCACAATTTTTTTCCGGAGGACTTTT
Mouse_Dlgap5_P24	TCGTCCGTCGTCATCCTGCTTTGCTT
Mouse_Dlgap5_P25	TGCTGTGGCCTGCCTTTCATTGCATT
Mouse_Dlgap5_P26	AGAAGACAGGACTGAGAATGACTTCACTGGG
Mouse_Dlgap5_P27	GTTGCTCATCAGCAAATCCTGGGAGGTG
Mouse_Dlgap5_P28	TCTTGTGAGGTGTTGCTCTGTGAGGAGGTAT
Mouse_Dlgap5_P29	GACTTTTATGTAACAGTACTGACTGCGACGC
Mouse_Dlgap5_P30	ATAGTGGTGAGAAGAGAATGAGGTCACCTCC

## Sheet: EGFP ORF
Probe name	Probe hybridization sequence (with FLAP concatinated on the 3' end)
EGFP_P1	CCGGACACGCTGAACTTGTGGCCGTT
EGFP_P2	TCAGGGTCAGCTTGCCGTAGGTGGCA
EGFP_P3	GGCAGCTTGCCGGTGGTGCAGATGAA
EGFP_P4	CTGAAGCACTGCACGCCGTAGGTCAG
EGFP_P5	GAAGTCGTGCTGCTTCATGTGGTCGGGG
EGFP_P6	CGTAGCCTTCGGGCATGGCGGACTTG
EGFP_P7	GTTGCCGTCGTCCTTGAAGAAGATGGTGC
EGFP_P8	CGAACTTCACCTCGGCGCGGGTCTTG
EGFP_P9	TTCAGCTCGATGCGGTTCACCAGGGT
EGFP_P10	TGTTGCCGTCCTCCTTGAAGTCGATGC
EGFP_P11	TAGTTGTACTCCAGCTTGTGCCCCAG
EGFP_P12	GTCGGCCATGATATAGACGTTGTGGCTGT
EGFP_P13	TGAAGTTCACCTTGATGCCGTTCTTCTGC
EGFP_P14	CTGCCGTCCTCGATGTTGTGGCGGAT
EGFP_P15	GTCGCCGATGGGGGTGTTCTGCTGGT
EGFP_P16	AGGGCGGACTGGGTGCTCAGGTAGTG
EGFP_P17	ATCGCGCTTCTCGTTGGGGTCTTTGC
EGFP_P18	CGGTCACGAACTCCAGCAGGACCATG
EGFP_P19	TTACTTGTACAGCTCGTCCATGCCGAGA

## Sheet: NIN
Probe name	Probe hybridization sequence (with FLAP concatinated on the 3' end)
NIN_P1	ATGGTACTTGTCATTGCTGATGAGGTTGTGG
NIN_P2	CGGATTTCAGCCTTAAAGCTGGCCAGAG
NIN_P3	TTTTAAGGCTGCTATTCGCTCCTTGTACT
NIN_P4	TAGAAGCTCATTTTCCAGACGACTGTTTTCC
NIN_P5	CATTTCTCATCTGTGTCAGTCTCTCTTCT
NIN_P6	CGGTGAGTTCTTCAACGGAAGCCTGAGCA
NIN_P7	GTTCTTTCATCTGTTCAATGACCAGCTCTG
NIN_P8	TTTTCTAAGGTGTGCGTTTCGTTCTCATGCC
NIN_P9	TGTATGTTTTCTCCAGCATCTCTCTCTC
NIN_P10	GTCATGTTCCATTTCTAGTCTTTCCAGCC
NIN_P11	CATGGCTAGAAGCTTGGACATCATTTCCT
NIN_P12	TGAAGTCTGGAGATTTCTGTGCTCATCTCG
NIN_P13	TCTATTTTGACTTCCTGTCTCTGAACAGAGC
NIN_P14	GTAGGTCCTGTTTCTTTTCAGAAGCTCGATC
NIN_P15	TCAGTGACTTCCTCCATTTTCTTCAGCT
NIN_P16	TTGACCTCATCGTAACTCTTTTCCAGGCT
NIN_P17	GATTAAACTTCTCTTGTTCCCGTTCCTCC
NIN_P18	GTGGAGGACTGCACTTTACAACGTTCCAGT
NIN_P19	TTTTGCTGGAAGTCAGAGAGATCGGGACATC
NIN_P20	CTCACTCAGAGCTTCCTTTTCTTTCAGC
NIN_P21	TTCCCAGGATTTCTGTTCCTGCTTCATC
NIN_P22	TTCTGCACGGTGTCTTCTAAATTCTGAACC
NIN_P23	CTCGTAGGTCAGATTTCATCCGGGACATTTG
NIN_P24	CAGCTGCTGTTCCTCATTCATCAGATGA
NIN_P25	ATTTTTCTTGCTCTGTGGGATTCATGGTACC
NIN_P26	TTCTTGTTCAAGGGAATTCATCTGACTGACC
NIN_P27	ATGAGCTGCTCATCCAGTTTTACTTGTTTC
NIN_P28	CCTGTGGTGTGTTGGTTTCGGAGGTCCTG

## Sheet: Others imaged in Fig S5
Probe name	Probe hybridization sequence (with FLAP concatinated on the 3' end)
CLGN_P1	GCAGTGACAGCTCAGATGTCCAAGTCGT
CLGN_P2	TTGCTTGGGCAGATGCTCTCTTGCGG
CLGN_P3	GCCATTTGCTTTTAACTCCCAAGCAAACAC
CLGN_P4	TGAACAGAAGACCCAAACATAGCCAAAAGGC
CLGN_P5	CCATCCAGCCAACCTTCCACTATCAA
CLGN_P6	TTTTAATACCAGTCCTCTGTCACCAGGTAC
CLGN_P7	ATGCACCTCCACAATCAATACCATCTT
CLGN_P8	TTCCAGAATCAAATCATCAGTGTCTGCTAGG
CLGN_P9	AAGGTCTACATCTGGAGGTTTGGCATGTTTC
CLGN_P10	TTTGGGAGGTTTGATAGGAGGAACCACATCC
CLGN_P11	GTCTTCTGGTTTGACGGCAGAAGGATCAGG
CLGN_P12	ACACTTGAATCTTCTATTTGGGCAGGTTCAC
CLGN_P13	GGATAAATTTTGGTTCATCATCAAGCCAGCC
CLGN_P14	TCCATCCGTGTCTTCATTCCAGTCATC
CLGN_P15	ATCCGACATGCTGGATTAAGAATCTGAGGTG
CLGN_P16	TGGGTTATCTATCATGGGAGGTTTCCACTC
CLGN_P17	ATTATCGACCAGTGGAGGTCTCCATACTC
CLGN_P18	TTAGGAATTTTTCGAGGACTCCAGATTCCCT
CLGN_P19	ATCTGCAGCCCAGTGATCTGCTACTT
CLGN_P20	TAAATCAACCAAAGCCATGGGTGCCCTT
CLGN_P21	CATTGGTTTTTCCAGGGCTGCTTTCTCTT
CLGN_P22	CAGATCCTGTGCTCTCATCTGCTTCT
CLGN_P23	TTACAATGCCAAACATCCCTCTCGGGAA
CLGN_P24	ATGTGCAGACTGATTAAAGTTCAGGTCTGGC
CLGN_P25	AATTTTGTGAATGGGGTAAACCACTCTGGCA
KRT8_P1	AAGCTGCTTCTTGGTGAGGAGAGCTCTC
KRT8_P2	GTCACCCTGATGGACATGGTAGAGGCA
KRT8_P3	CAGCAGGCTCTGGTTGACCGTAACTGC
KRT8_P4	AGGGTCTTGATCTGCTCCTTCTCCTG
KRT8_P5	CTCCACTTGGTCTCCAGCATCTTGTTC
KRT8_P6	CTCTCGAACATGTTGTCCATGTTGCTTCG
KRT8_P7	AGAGTCTCCAGCTGCCGCCTAAGGTT
KRT8_P8	CTTCTTGATGAGGACAAATTCGTTCTCCATC
KRT8_P9	TCCAGCTCTACCTTGTTCATGTAAGCTT
KRT8_P10	GAAGTTGATCTCGTCGGTCAGCCCTTC
KRT8_P11	CAGCTCCCGGATCTCCTCTTCATATA
KRT8_P12	CTGTTGTCCATGGACAGCACCACAGAT
KRT8_P13	ACCTCAGCAATGATGCTGTCCATGTC
KRT8_P14	CGGCTGCGGTTGGCAATATCCTCGTA
KRT8_P15	CTCTGCAGCTCCTCATACTTGATCTG
KRT8_P16	GCTGATGTTCCGGTTCATCTCAGAGATCT
KRT8_P17	CTGGCCTTTGAGGCCCTCAATCTCAG
KRT8_P18	AGGGCCAGCTTGACGTTCATCAGCTC
KRT8_P19	CTGCATAGCCGCTGGTGGTCTTCGTA
KRT8_P20	CCAGCTTCCCATCACGTGTCTCGATC
KRT8_P21	GCTGTTCACTTGGGCAGGACGTCAGAG
KRT8_P22	ATTGAATTGTTTTGTAGCTGGAGGCATGGGC
KRT8_P23	TGGCAGAGCTAGCTGAGGTTTTATTTTGGAC
BNIP3L_P1	ACGACATTGTCGGACAGCTGGCAGGAC
BNIP3L_P2	CTGTTCATGGGTAGCTCCACCCAGGA
BNIP3L_P3	TCTCCATGTCTCCATTGTGGATGGAGGA
BNIP3L_P4	ACTCTGTCCTGATTCATGTTGTGCATCC
BNIP3L_P5	GCGAAGGGCTGTCACAGTGAGAACTGC
BNIP3L_P6	CATTTCCACATCAAACATGATCTGCCCA
BNIP3L_P7	CTTCTTCTTCTGACTGAGAGCTATGGTCC
BNIP3L_P8	TTTTCTTCAAAGCCTCGACTTCCTTCTCT
BNIP3L_P9	TTCGGGTCTACTGGACCAGTCTGATACC
BNIP3L_P10	ACGTTTAGGGTGTCTGAAGTGGAACTCCTTG
BNIP3L_P11	CCTTTCTTCATGGCTCCACTTTTCCTC
BNIP3L_P12	CATTTCCAGGGGCTTTTCCTTTCCCTC
BNIP3L_P13	AAAACAGGGTGGTAGGTTGGGTCATGCTTAC
BNIP3L_P14	ATACCATGAATGATACAGGTCTAGTCTGGTG
BNIP3L_P15	TAAAGGCTTCAGAGTATAGGTGATGCTTCCT
BNIP3L_P16	ACCCAAGTCTGTTTTTCCAAGTTGCACAAGT
BNIP3L_P17	ACAAATGGCATCTTTTCAGAACGCTGTCAAC
BNIP3L_P18	AAGACAGCTACATGAGAAAATGACCAGTGCC
BNIP3L_P19	AAACATGTGGTATCCTTCAGAGTCATGCTAG
BNIP3L_P20	TCAAGTTGACCTGGTGCACTTTATAGATTGC
BNIP3L_P21	AGAGTTAGTTTCTGCAAACTGGCAAACCTGT
BNIP3L_P22	TCAGGCTTTTCAAAAATCAGTGAGCCATCAG
BNIP3L_P23	TGCATACTGTAGCAGTTTAGCTAGTCAGTTC
BNIP3L_P24	TGCTGCTGAACTTGGAAAGAGCACAATGC
BNIP3L_P25	TGGGTGTAGCAGTAAAACGTTCATCCCATGT
BNIP3L_P26	TTTTTACTGCAATCACGGGAACTTGTTGCAC
KAT2B_P1	AGTGGGTGAGGGGTTAGGGTTTTTCCAGCC
KAT2B_P2	GTTAGACTGACAATTATTTGCTGCAGGTCGG
KAT2B_P3	TGAGCAGCTAGGGCATGGCTACAACT
KAT2B_P4	TCATTTCTTCCTCTGACACATTCTCCAG
KAT2B_P5	ATGGGGGTTTCTTTTCCAAAGAGCCTTCAAC
KAT2B_P6	GAGATGGTGCCTCCAGATGCCAATAGTT
KAT2B_P7	TGTCGCAGAACTGTGGCACGTTGCAGTAA
KAT2B_P8	TTGTCGCCTCATAACAGTGAAGACCGAGC
KAT2B_P9	TCCTGATCCCAGATGGGAGAGTTTTGACTA
KAT2B_P10	TGGCTGCTCAAGGGAAGATGAGGTTGAATTG
KAT2B_P11	AAGAGGCTTTGCAGGCAGGACTGCTG
KAT2B_P12	TCATTTTCCTCTTTTCTCCTGGGTTTGCC
KAT2B_P13	GGGGTTTCTTGGCCTCCTCCAGAACA
KAT2B_P14	ATCCCTGGCCGAGTGTGCTGACAGAA
KAT2B_P15	TTTGGTTTCTGGTTGAGGGAATTGCCAACCA
KAT2B_P16	TTCTGTAGGCCAACCAGCCACATCAG
KAT2B_P17	TTCTTTTGGCATTCGGGGCAGCTGGTG
KAT2B_P18	TCAAATGATTCATCAGGTGTGTTCCATAGCC
KAT2B_P19	ATCCCATTAAAGTGGCTCCTTCATAATCC
KAT2B_P20	CTCTTGAGCGTGCTGTAAAGCTGGTCAGG
KAT2B_P21	CAAGCGCTTTGATGGCTCTTCACCTG
KAT2B_P22	CTGGAGCTTCTGTTCTCTTCACAGGTTC
KAT2B_P23	GGTTTTCAGATCCATGGGGAACCTTATAACT
KAT2B_P24	TTCTTAGACACGTAGTACCTATTCTTGAGGC
KAT2B_P25	TGCAATTGGTAAAGACTCGCTGTAAGTCTGC
KAT2B_P26	ATTGGCACATTTGTAGTATTCACTCTCAGGG
TOP2A_P1	GCTCTTCTGACCATTAGTGCAACAATATCT
TOP2A_P2	GAAAGACTTTGACATCTTTGGTGGATCCAGC
TOP2A_P3	CAAGGAGTTACCAGTTTCATCCAACTTGTCC
TOP2A_P4	CCTTGGATGTAGCAATGCTGTTGACAAAGC
TOP2A_P5	CCTCAGTCAGGATAAGCGTACACTCAGTG
TOP2A_P6	TCGCAGAAGAGAGGGCCAGTTGTGATGGAT
TOP2A_P7	TTAGCTTCCTTTGATGTGCTGGTGCCC
TOP2A_P8	CTATCTGTTTTTTGCTAAAGGCCAGGCTGAT
TOP2A_P9	CTAATTGGGCAACCTTTACTTCTCGCTTGT
TOP2A_P10	CGTGGACTAGCAGAATCCTTGCCACC
TOP2A_P11	GATTTTGCAGGACCACCCAGTACCGATT
TOP2A_P12	AACTTGGAAGCATTGGCAAAGGTTCTTCTCC
TOP2A_P13	TCTAGAACTTGTTCTTTGTATGTCTGGGTCC
TOP2A_P14	ATGAGAGGAGGTGTCTTCTCGGTGCCAT
TOP2A_P15	TTGAAGACTTTGTGTAGTCCAACTCTCTCTG
TOP2A_P16	GAACCTTTTGCTGGGCTTCTTTCCAGG
TOP2A_P17	AAGGTTGGTCCAGAATCTGTTACGGAGTCAC
TOP2A_P18	TCATTTCTTAGCCTGCAGAGTTCATCTTTC
TOP2A_P19	TCCCAGGAAGTCCGACTTGTTCATCTTGT
TOP2A_P20	GTGGAATGACTCTTTGACCACGCGGAGAAG
TOP2A_P21	TGAATTTTGTTTTTGTTGCTGCTCTCCGTGG
TOP2A_P22	AGTTTTGGTCTTAGGTGGACTAGCATCTGAT
TOP2A_P23	TGGTACACTGCCCTTAACATCATCAGC
TOP2A_P24	GTTTCATCTGGGAAATGTGTAGCAGGAGGGC
TOP2A_P25	TTTTTGGCACCGGTAGTGGAGGTGGAAGACT
TOP2A_P26	TCAAAGCTGGATCCCTTTTAGTTCCTTTTGG
TOP2A_P27	GATTCTTGGTTTTGGCAGGATCAGGCTTTTG
TOP2A_P28	TGGATTTCTTGCTTGTGACTGCTTTCGAAAC
TOP2A_P29	AGGTTTCTTTGCCCGTACAGATTTTGCCC
SFR1_P1	GAAAGTGAAATCTTGGTTTTTCTCTGCGGCC
SFR1_P2	GAGTGCTAGGTAAAACCACAGCTGAGTCTG
SFR1_P3	TTGTATAGGGAGATGATGGATTCGCAGAGGC
SFR1_P4	TTCCTTAATCTTTCTCTAAGTGTTGCACTCA
SFR1_P5	AAAGGTCTGATCATTTTCTTCACTCTCTACT
SFR1_P6	ATTCCAAACAGTTTTCCTCTGTGGAAGATGC
SFR1_P7	AGAGCACTGCATGATCCAGAATCAAGTGAC
SFR1_P8	TGTTTAGGAAGCTTCTCACTCACAAACTCAT
SFR1_P9	CCTGAACCTGCTTCACCAATTTGGCTT
SFR1_P10	TGACTAGTTTTAGCCTCCGAAGAAGGTCTTC
SFR1_P11	GCAACTCATAAAGCAAGAGCTGGCTACAG
SFR1_P12	GCTTAGTTTCTTGTTCTCTTCAGACACAGC
SFR1_P13	ATCATCTAACCCATAGTGGTCTATCAATTGA
SFR1_P14	AGTGCCCTTAATTGATATTCATTGGGATACC
SFR1_P15	AAACTAGTTTCCAGAACTGCCCAAATGACTT
SFR1_P16	ACCTGCTAGACTATCAGATGGAAATATGTGG
ECT2_P1	TTCCGGAGAATCCAAACCTTCAAATTCTTCC
ECT2_P2	GATTCATCATACTTGTACAATACAACGGGCG
ECT2_P3	TGGAGTACCTAGACTCACAGCAACCCT
ECT2_P4	GCCTTTCCCAAGCTTTATAAATCCATTCTG
ECT2_P5	TCCAAGCGGTAAATATTTACCTCCTTGCAT
ECT2_P6	AAGCATTGACACTGATTTCTTGAGCTCAGGA
ECT2_P7	AAACGACGTCGTTTGCGATTGCTGTTAGGGG
ECT2_P8	ACGTCTGTCTCTCTTGAAAGCTGAGCAAG
ECT2_P9	ACTTAGTACAAGACTTTGGGGTGTGGGGTGG
ECT2_P10	TTAATCTCCTCTGGTGCAAGGATAGGTCC
ECT2_P11	TGTGTACATCAAAGATATCTGGGATGCTACC
ECT2_P12	AGAAGTTCAACAAGGCTCTGCCGTCCAC
ECT2_P13	AAAGTAATGCAACACTGGGTAACCTCTGTAC
ECT2_P14	CGTCATTACTTCCTTCAGTGATCCAATAGC
ECT2_P15	CACCTAGAGAAATTGTTTCAACCCGCTGTAC
ECT2_P16	GAGGAAGAGAGTTACTTGTTCTCCTCTGTCA
ECT2_P17	AGGTGAATATGCTTAAGAGAAGCTGGGGGTC
ECT2_P18	TATGGCAATCTTCTGTCTCTCTTATGTCC
ECT2_P19	GCTCTGTTGGTGGCCTCACAAGCAAG
ECT2_P20	TTCATCTGATGTCATCTGGAAACTGAGTAGC
ECT2_P21	TGTTAGCTACATGTCGACACAGCATCTTTAG
ECT2_P22	CATAAGAGCCCTTCGAAGAGCTCTTTTTGGA
ECT2_P23	GGAAGGACTTCTTCCCTCCACTGAGC
ECT2_P24	TGATGTGCTAGAAAGACGACTCATTACATGC
ECT2_P25	AGGAAGGAAGGCTGACAAGGGAGGGAGAAGG
CIR1_P1	GCAACGTAAACAAACTCAGCCGCCTAAC
CIR1_P2	TTGGAACTGGAACTAGGGAAAGCAGGGGCT
CIR1_P3	AGTCTTTCTTGCACATGAAGTTGGCGAAGGA
CIR1_P4	CATTCTTTACACGTTCATCTCCCATAAGCAA
CIR1_P5	CGTGGGGCTCCTTTCTGCCATTCAAAT
CIR1_P6	CTGATCTCTGATGTTCATGTCATCTTTGGC
CIR1_P7	CATTTAATGCACCTCACATTTCGAACCTGAA
CIR1_P8	AAGGACATTCTCGATCTGTGTTGACATGACC
CIR1_P9	AGCCATCAGTGGGAACCGAACTTGCATT
CIR1_P10	CAGTACATTTCGTTTCAGTGCAAACCCACTG
CIR1_P11	ATACTCCTGTGATGGATCATTTGCGGTCA
CIR1_P12	AAAAATTCAACTTCTGGATCTTCTTCACCCT
CIR1_P13	AATCACTGTTGTTATGCCCTGAACACTTGTT
CIR1_P14	TTCATGAAGCTTTCTCTTCTTAGACTTGTCC
CIR1_P15	CTTGGCTTTTTCCCGGTTATGGTGACTGC
CIR1_P16	CCTCCCTAGAACTCTCGTGTTTTAAGAACC
CIR1_P17	TCTGGACTTTTTGTCAGAATCAGAATGGCTC
CIR1_P18	CCCTCCTTTCTTTCAGAGCCTCTCTT
CIR1_P19	CTGTGCCCGTTTCCTTGTCTCCCTTT
CIR1_P20	CTGTCATTTCTTCTGCTTTGCTCTTCAC
CIR1_P21	ACATTTTTTCTCCTCTATACAAGTCTGTGCC
CIR1_P22	CTCTTTGTGTCACTTTAGTATGTGTACCTCC
CIR1_P23	ATTCCCAGGTAATTGTCACATACAGTCTTTC
CIR1_P24	CAGTTACCAACAGAAAATATTTCCACAGCCC
SPG20_P1	GCAGGTTCTCCATTTTGTGGCTCTTGC
SPG20_P2	GTCCTATTCCTTGCTTATAGTAGTTCTTTGC
SPG20_P3	GTTCAGACTCTTTTGATGAAATGCTGATCCC
SPG20_P4	TTCTGTTGCATCTGTCTAGCAGATTCCC
SPG20_P5	CCAGCCTGGTGCGTACATTCTGTAGAGT
SPG20_P6	CATTCTGCAGAGAAGTGGCAAGACCCTTC
SPG20_P7	GGAGGAGCTTCTGCTGGACAACTTTGTGA
SPG20_P8	TACAGTGTAGTGACCTTCAGCAGCTTGAGG
SPG20_P9	CAAGAGGCGGTGGCTGAGAATGATTCCTAT
SPG20_P10	GCTCCCGCAGTACATTTCAGAACCGGA
SPG20_P11	ATCCTGCTGCTTGTAGCATTGTATCAGG
SPG20_P12	TCTGCTCTGTTCCAGTTGGCCTGGAG
SPG20_P13	AGGGTCTAGTTCTTCCAGGGATTTGGAATTC
SPG20_P14	TTTCACATCAGTGCCAGAGGCTTCTTTTAGT
SPG20_P15	TTTCCTTTATGACGTACATCCTTATTGCCTT
SPG20_P16	TAACTTCTTCACTTGAAGTATCTTTAGCCCT
SPG20_P17	AATTCTTTTGGCTTTTCTTCTGGAACTGGCT
SPG20_P18	CGCTCTCGGAGTTTAGAAGCACCTTTCTG
SPG20_P19	GCTGGACTAACTTCCACGGGTTTTTCTTC
SPG20_P20	TCCTGTAGCTTGCTTCGCTATATAAAGTCC
SPG20_P21	GTGGAGCTAGTTCTTTTCCAACGCAATTTGC
SPG20_P22	GCACCATCCAGAGGAGATTTCCCATC
SPG20_P23	ATTGTTAACGATGCATTTAGCTGCACATTCC
SPG20_P24	CGCATGGTGGGTAGCTTCTCCTGCAT
SPG20_P25	GTGTCCTGTTTGTGTTGCAGTTTTCTTCACC
SPG20_P26	TTATCTTTCTTCTTTGCCTCCTTTACTTCC
CENPQ_P1	GAGAGCCGCGCTTAGAGTAATTCGCGC
CENPQ_P2	TAAACACAGTGCACTGATTCTTCTTGCACC
CENPQ_P3	TTCTTGGAAGCATTTGCTTTACCAGACATCT
CENPQ_P4	TTCACTGTGTTTCTAACCTTATTCTCTGACA
CENPQ_P5	GCTGCTGTCTTTCCGTGTTTTAGGTTAGTGT
CENPQ_P6	CTCTTTGACAGAGGTTGCCAGGTTTTTCTCT
CENPQ_P7	ACTGATTCCATCATAGTTTGCAAATGGTCTC
CENPQ_P8	AATCTTCCATCTTTTTGGGAGGGACTTTCAG
CENPQ_P9	CATTAGCTTTGTCTCGTGCCCTTTCCAT
CENPQ_P10	TATCTATTTCTTCCTGTAGTAATGCCAGACC
CENPQ_P11	TTAGGCTCTGAATATTCCCAGTCATTAACTC
CENPQ_P12	TCCACCTCACTTGCCAGAATCTGAATTTT
CENPQ_P13	TTTGATGCATCTGTTTTACTCTCTCCTCTT
CENPQ_P14	AAAGTTCCGGAAGAGAGAGTACTCCACTACT
CENPQ_P15	TAGAAGAGCATTCTGGTTTGGAATTAGCGCC
CENPQ_P16	AGGTTGACATGCTCTTCATCTGTGATGAATT
CENPQ_P17	AAGATGCATCCAGTTTCTTATAGGCTTCTTC
CENPQ_P18	TATCAGGAGATAATAAATCCTGCAGAAGCCT
CENPQ_P19	TCCTAGATTTGGCAACTGCTAAAAACAGTCT
CENPQ_P20	TCCATTCAGGCATTATAAACTACTAGATCCT
CENPQ_P21	GTGTATGTAAACACTTACTTATCACAGCTCC
CENPQ_P22	AGTTCCAGATGACCAGACAGAAACTGTAAGC
CENPQ_P23	ACCTCCAAAGTTAAAGATAGCAGGCATATCT
BLOC1S2_P1	CCTCCACTTGCCTTCATTCCATCAAG
BLOC1S2_P2	CTACACCCGGTGCTAATCCAGCCAAA
BLOC1S2_P3	TTCAGCAGGCTCCTTTGCTTCCTCAG
BLOC1S2_P4	GGAGAACATGTCCCGGCAGAGCTCAGT
BLOC1S2_P5	TGATCCAGATAAGGCTGCAGTCCAGCA
BLOC1S2_P6	AGCTGCTACCTGCTCTTCAATGACAT
BLOC1S2_P7	TATGCATCCAACTTGTAAGCTGCCTGC
BLOC1S2_P8	CCAGCTTCTTGTACTTGGCTTCCAGTTTTT
BLOC1S2_P9	TGAGGAATTTTCACAATTCATCAGCCTCAGG
BLOC1S2_P10	TCCAGTTTACTCGAACGTTGAGATGTTCCTG
BLOC1S2_P11	TCTGTCTCAAAGAAGGTTCAGGAATAGCCAC
BLOC1S2_P12	TCCAGCTGTTTTCTGAACTTTGTGAGAGTCT
BLOC1S2_P13	AGTTACCGACATTCACAAGGTGATAAGCTGC
BLOC1S2_P14	ACCCAACACATAAACACACATACCCATC
BLOC1S2_P15	GCTGCCTATCTTTCAACCTAGACTGGT
BLOC1S2_P16	CTTCCCAGCTGCTAATGTTGTGTTCTGG
BLOC1S2_P17	AACTCTTTGGGATATGTAATTGGGGACCTCA
BLOC1S2_P18	TGATGACTGTCTGGAACAGAGGGGAAATGAC
BLOC1S2_P19	GGCCAGTTTACATTTTTAAGATTGCTCTGGC
BLOC1S2_P20	TTTTCAGAGGCCATGATAAGTCACTACAGGG
BLOC1S2_P21	TTAAATAGGGGCCTTATGTTAGGCACGGTGG
BLOC1S2_P22	AAACTCATCCATGGGAATTTAAGGTGGCTGA

## Sheet: FLAP probes
Probe names	Probe sequence
FLAPX	CACTGAGTCCAGCTCGAAACTTAGGAGG
FLAPY	AATGCATGTCGACGAGGTCCGAGTGTAA
